# Supplementary material for: 3D Chromatin Organization Involving MEIS1 Factor in the cis-Regulatory Landscape of GJB2
Source: MDPI journal article supplement (doi:10.3390/ijms23136964), 2022-06-23
Supplement: s1 [file s1]

## Supplementary figure and tables

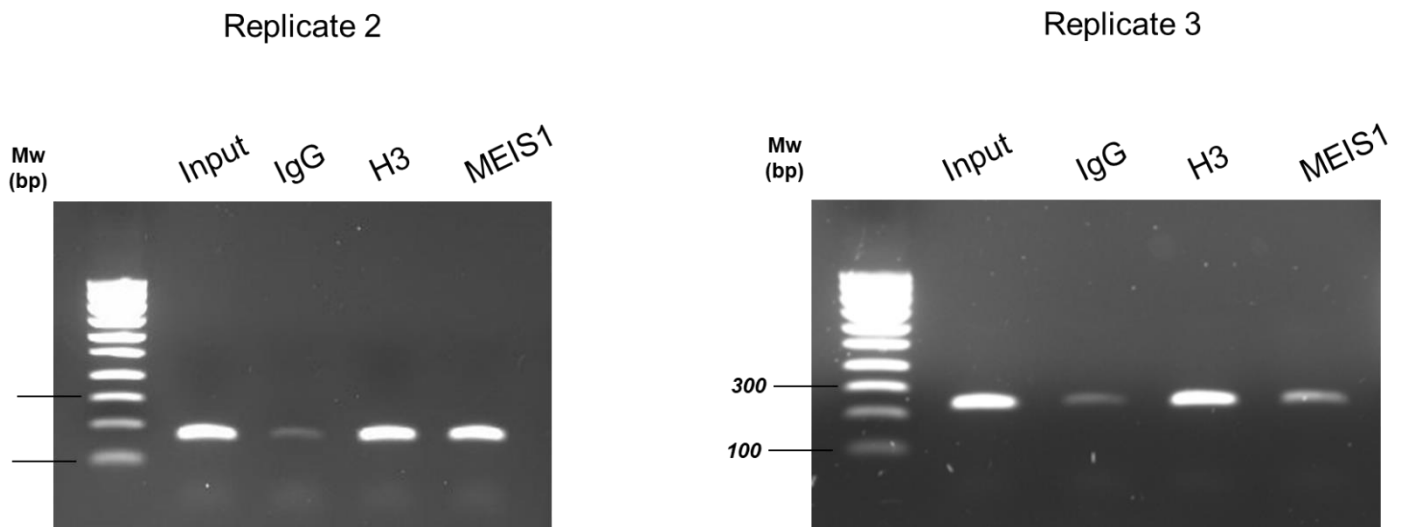

**Figure S1. MEIS1 transcription factor contributes to *GJB2* expression, related to Figure 2.C**

Binding of MEIS1 on C3 enhancer by ChIP-PCR. Two other replicates and in total three independent chromatin immunoprecipitations.

| sgRNA# | target<br>region | Sequence                      | PAM | Strand |
|--------|------------------|-------------------------------|-----|--------|
| 1      | PGJB2            | <u>G</u> AGACTGGGAAAGTTACGGAG | GGG | +      |
| 2      | C3               | <u>G</u> CCTGTCAAGAGTCTTCCAAG | AGG | +      |
| 3      | C3               | GCTGCCCCACAATTACTCAC          | AGG | +      |
| 4      | C3               | <u>G</u> TTGCTTCCCCCACATGCAAC | AGG | +      |
| 5      | C3               | AGCTTGTAAGTGCCGGCAAC          | AGG | -      |

**Table S1. CRISPRi and CRISPRa information, related to Figure 1.**

Lists of sgRNA used for the both techniques.

G' was added because it is slightly more efficient

|                             |                        | genomic position chr13 (hg19) |            |            | distance from the           |        | length of   |      |
|-----------------------------|------------------------|-------------------------------|------------|------------|-----------------------------|--------|-------------|------|
|                             |                        | chr13                         | 20 771 695 |            | <i>GJB2</i> transcriptional |        | interacting |      |
|                             |                        | chr13                         | 20 766 541 | 20 768 081 | start site (kb)             |        | region (kb) |      |
| <u>4C significant peaks</u> | <i>TSS GJB2</i>        |                               |            |            |                             |        |             |      |
|                             | <i>PGJB2</i>           |                               |            |            |                             |        |             |      |
|                             | <i>Viewpoint PGJB2</i> | -220                          | chr13      | 20 980 139 | 21 005 586                  | -208,4 | -233,9      | 25,4 |
|                             |                        | -290                          | chr13      | 21 043 822 | 21 076 849                  | -272,1 | -305,2      | 33   |
|                             |                        | -625                          | chr13      | 21 384 908 | 21 408 432                  | -613,2 | -636,7      | 23,5 |
|                             | <i>Viewpoint C3</i>    | P                             | chr13      | 20 765 648 | 20 776 998                  | 6      | -5,3        | 11,3 |
|                             |                        | -20                           | chr13      | 20 786 728 | 20 796 959                  | -15    | -25         | 10,2 |
|                             |                        | -625                          | chr13      | 21 387 057 | 21 400 524                  | -615,4 | -628,8      | 13,5 |
| Name of peaks               |                        |                               |            |            |                             |        |             |      |

**Table S2. 4C peak coordinates, related to Figure 3 and 5.**

PeakC calling determines genomic coordinates for each significant interactions.

| Viewpoint | Direction   | Orientation | Adaptater                       | Specific primer        | Orientation | Primer sequence                                       |
|-----------|-------------|-------------|---------------------------------|------------------------|-------------|-------------------------------------------------------|
| PGJB2     | Reading     | 5'          | TACACGACGCTCTTCCGATCT           | CTCCGCGACTCGAACAGATC   | 3'          | TACACGACGCTCTTCCGATCTCTCCGCGACTCGAACAGATC             |
| PGJB2     | Non-reading | 5'          | ACTGGAGTTCAGACGTGTGCTCTTCCGATCT | GAGACAAGCCTCGTTTTTGCC  | 3'          | ACTGGAGTTCAGACGTGTGCTCTTCCGATCTGAGACAAGCCTCGTTTTTGCC  |
| C3        | Reading     | 5'          | TACACGACGCTCTTCCGATCT           | GGAACCACTGGGTCAGAT     | 3'          | TACACGACGCTCTTCCGATCTGGAACCACTGGGTCAGAT               |
| C3        | Non-reading | 5'          | ACTGGAGTTCAGACGTGTGCTCTTCCGATCT | GAATAAAAACTTGAGTAGCATG | 3'          | ACTGGAGTTCAGACGTGTGCTCTTCCGATCTGAATAAAAACTTGAGTAGCATG |

**Table S3. 4C-seq primers for PGJB2 and C3 viewpoints, related to Figure 3.**  
 Lists of primers used for 4C-seq PCR.

| cCRE         | Direction | Orientation | Specific primer           |
|--------------|-----------|-------------|---------------------------|
| <i>PGJB2</i> | Forward   | 5'          | CGGTGAATTTAAAACGTTTGGTGGC |
| <i>PGJB2</i> | Reverse   | 5'          | CCGCAGAATCCTATCAGTTTCC    |
| -625-L       | Forward   | 5'          | CTTTAGGAGAGCTCTCAGTCAG    |
| -625-L       | Reverse   | 5'          | GATCTTTCGCCTGTCTCCATAG    |
| -625-R       | Forward   | 5'          | GATACTGCCACAGTAACTGAGG    |
| -625-R       | Reverse   | 5'          | GGATCACACATCTGCTAGCTAC    |

**Table S4. PCR primer sequences used for cloning into the luciferase reporter construct (5' - 3'), related to Figure 4.**
